# Supplementary material for: EORTC QLU-C10D value sets for Austria, Italy, and Poland
Source: Springer Nature journal article supplement (doi:10.1007/s11136-020-02536-z), 2020-05-26
Supplement: MOESM1 [file 18017160]

EORTC QLU-C10D value sets for Austria, Italy, and Poland, Quality of Life Research,  
 Gamper EM, King MT, Norman R, Efficace F, Cottone F, Holzner B, Kemmler G;  
 Corresponding author: Eva-Maria Gamper, Department of Psychiatry, Psychotherapy and Psychosomatics,  
 University Hospital Psychiatry II, Medical University of Innsbruck, Innsbruck, Austria;  
 eva-maria.gamper@i-med.ac.at

Difficulty compared to other surveys

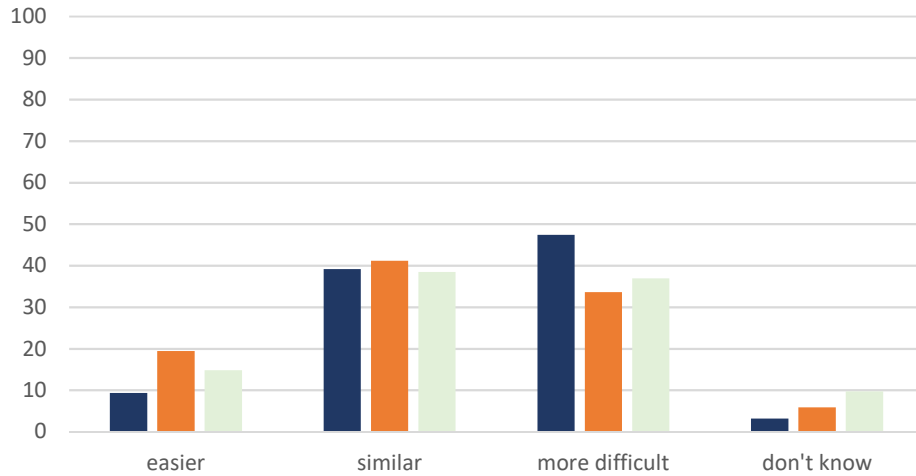

Clarity of presentation of health states

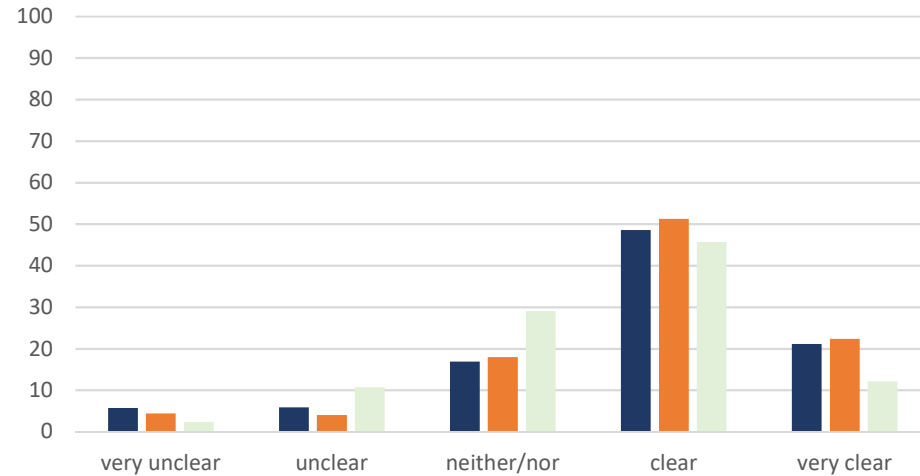

Difficulty to choose between health states

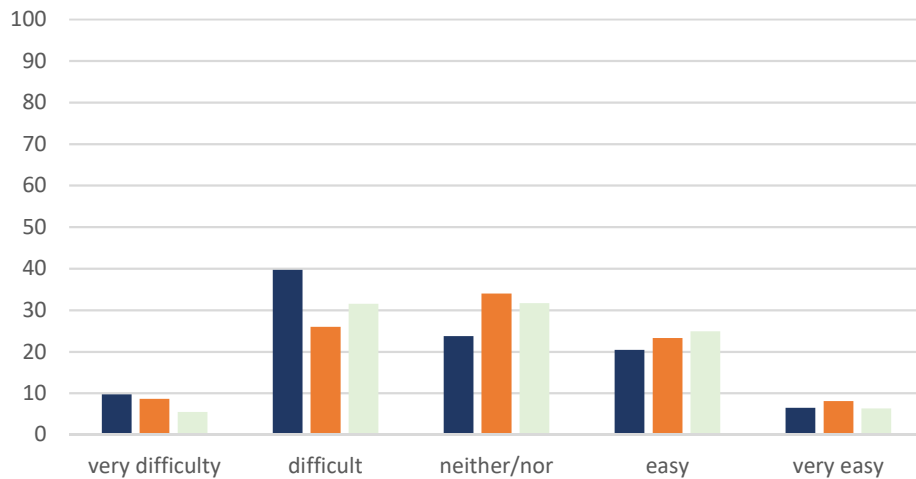

Decision strategy

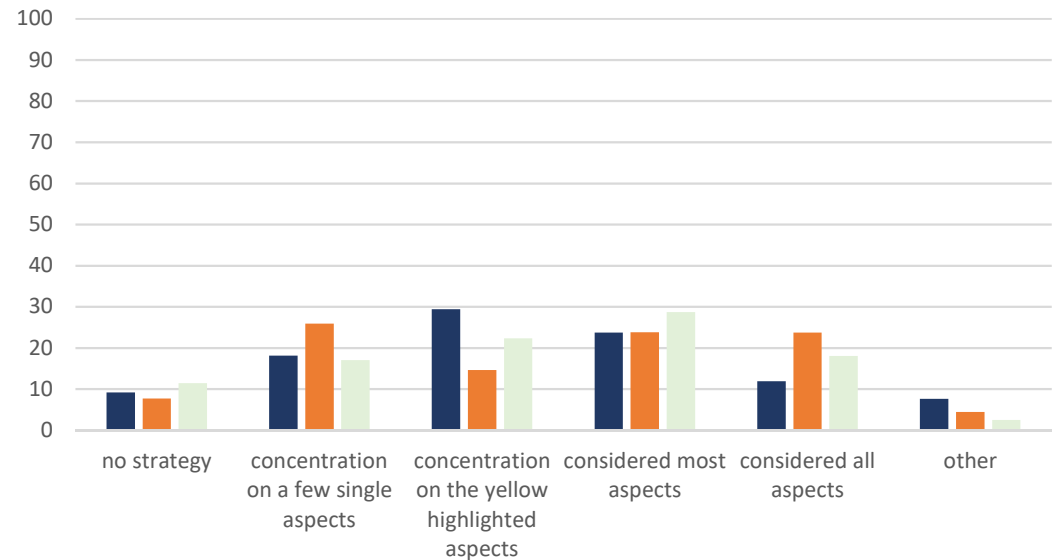

■ Austria ■ Italy ■ Poland
